# Supplementary material
Source: PubMed Central journal article supplement (PMC2940233)

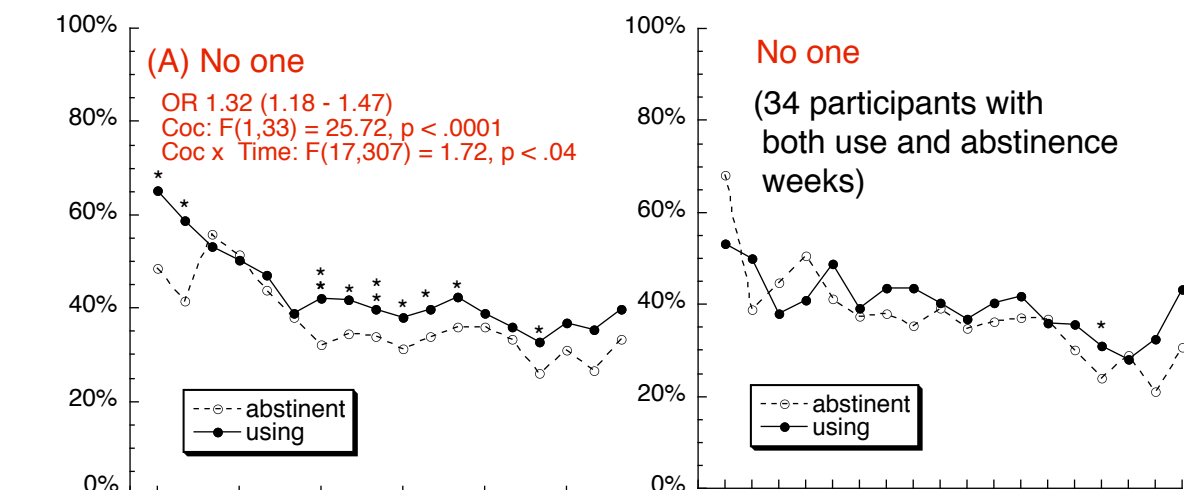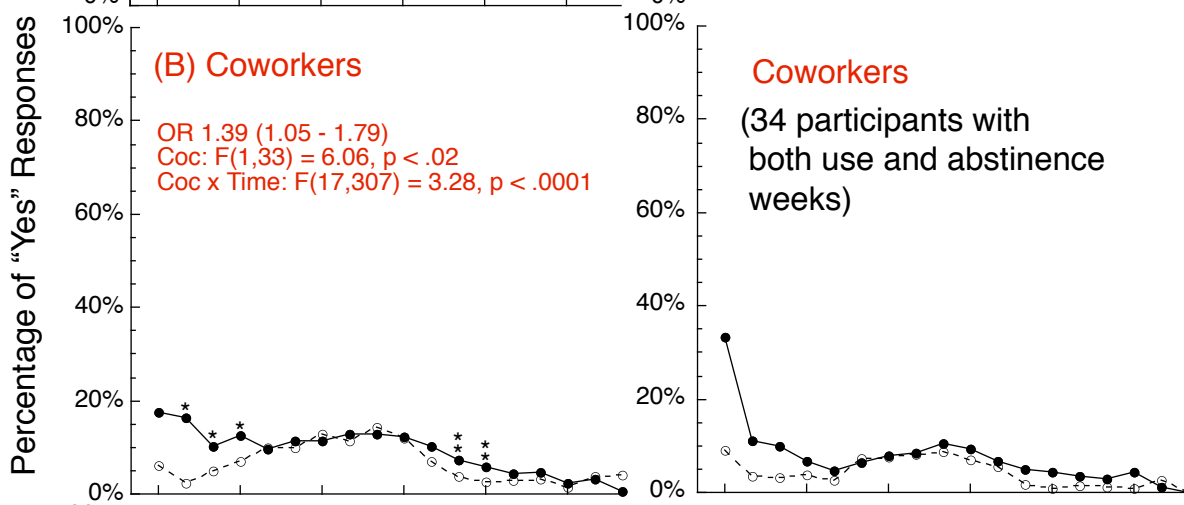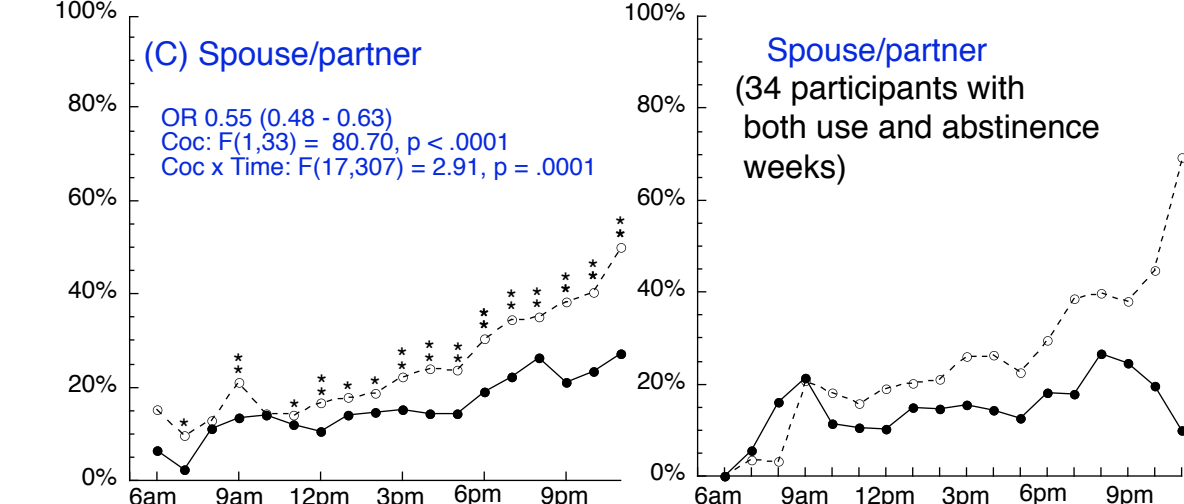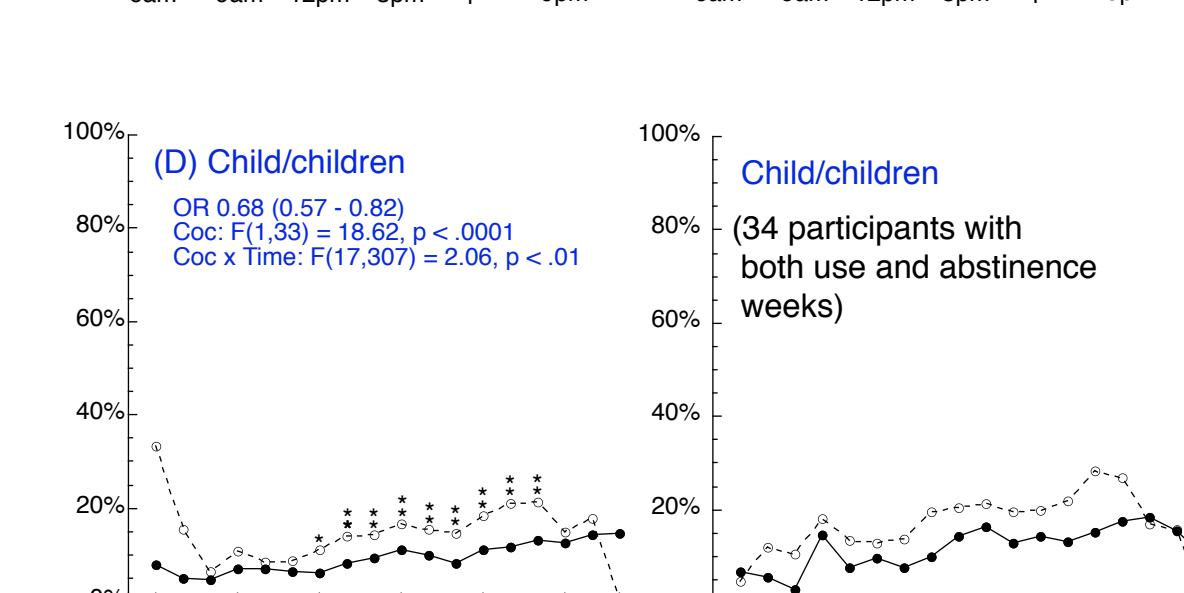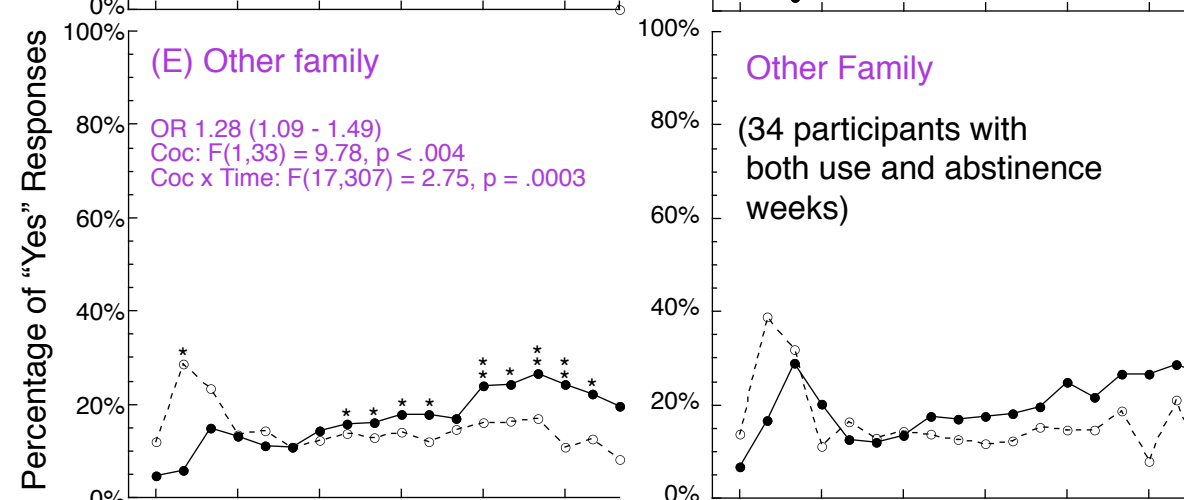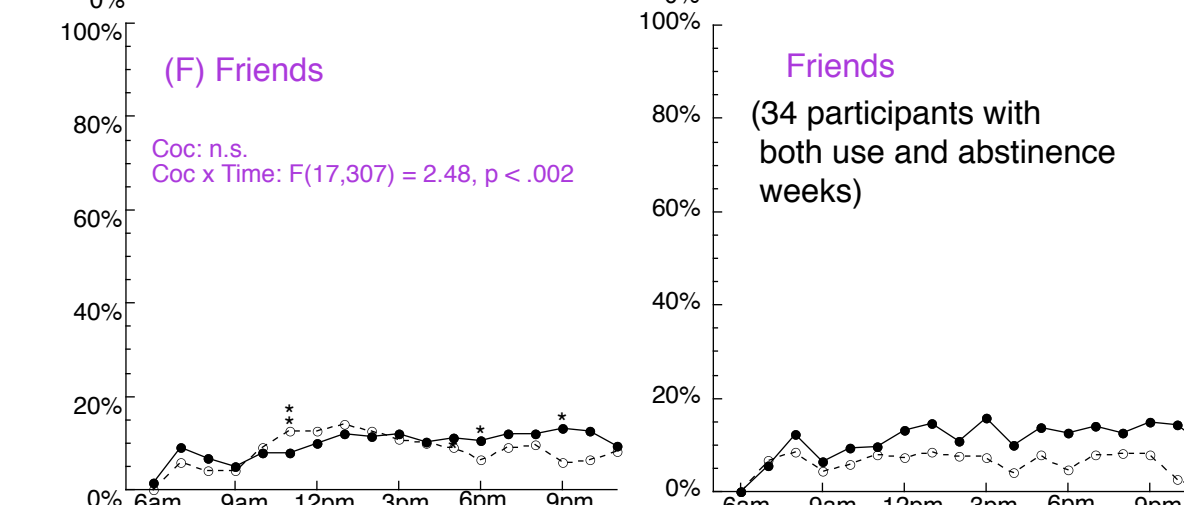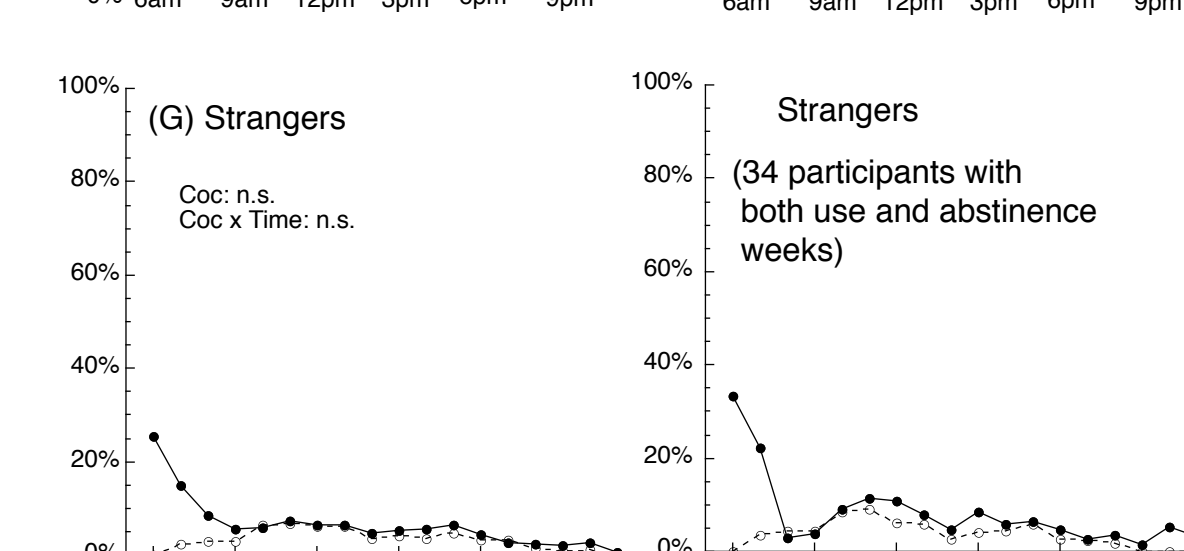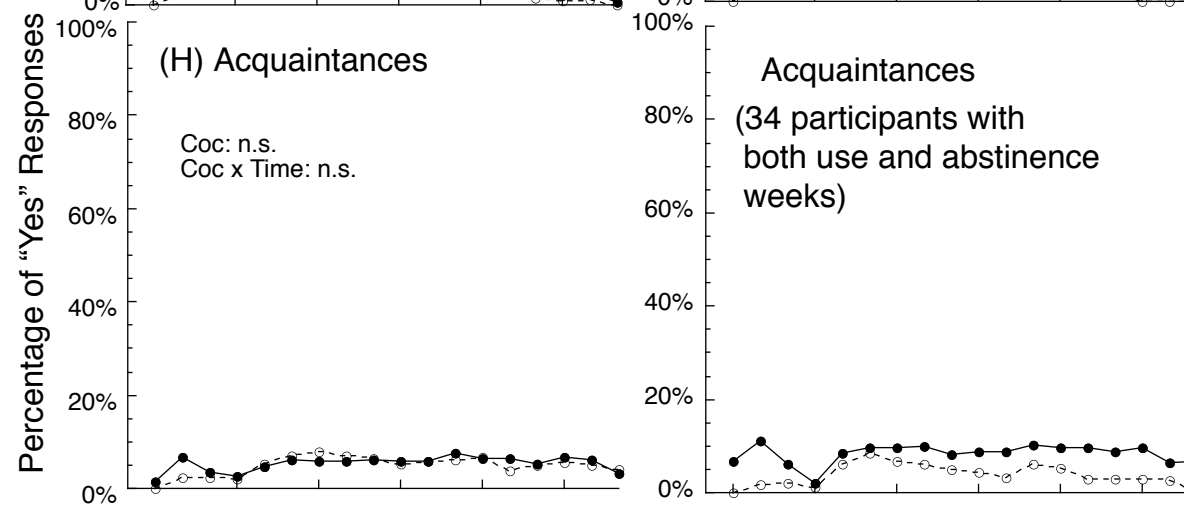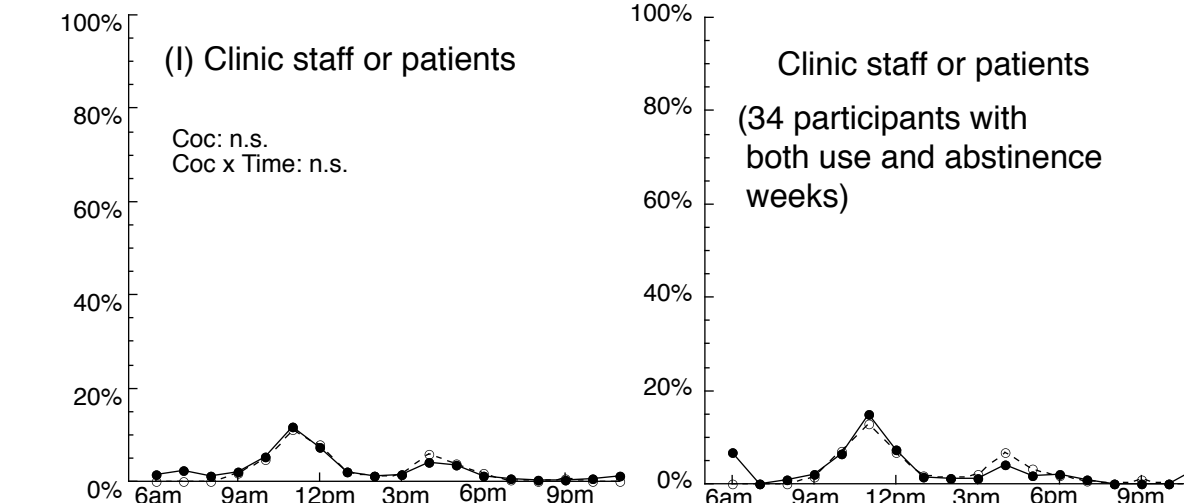

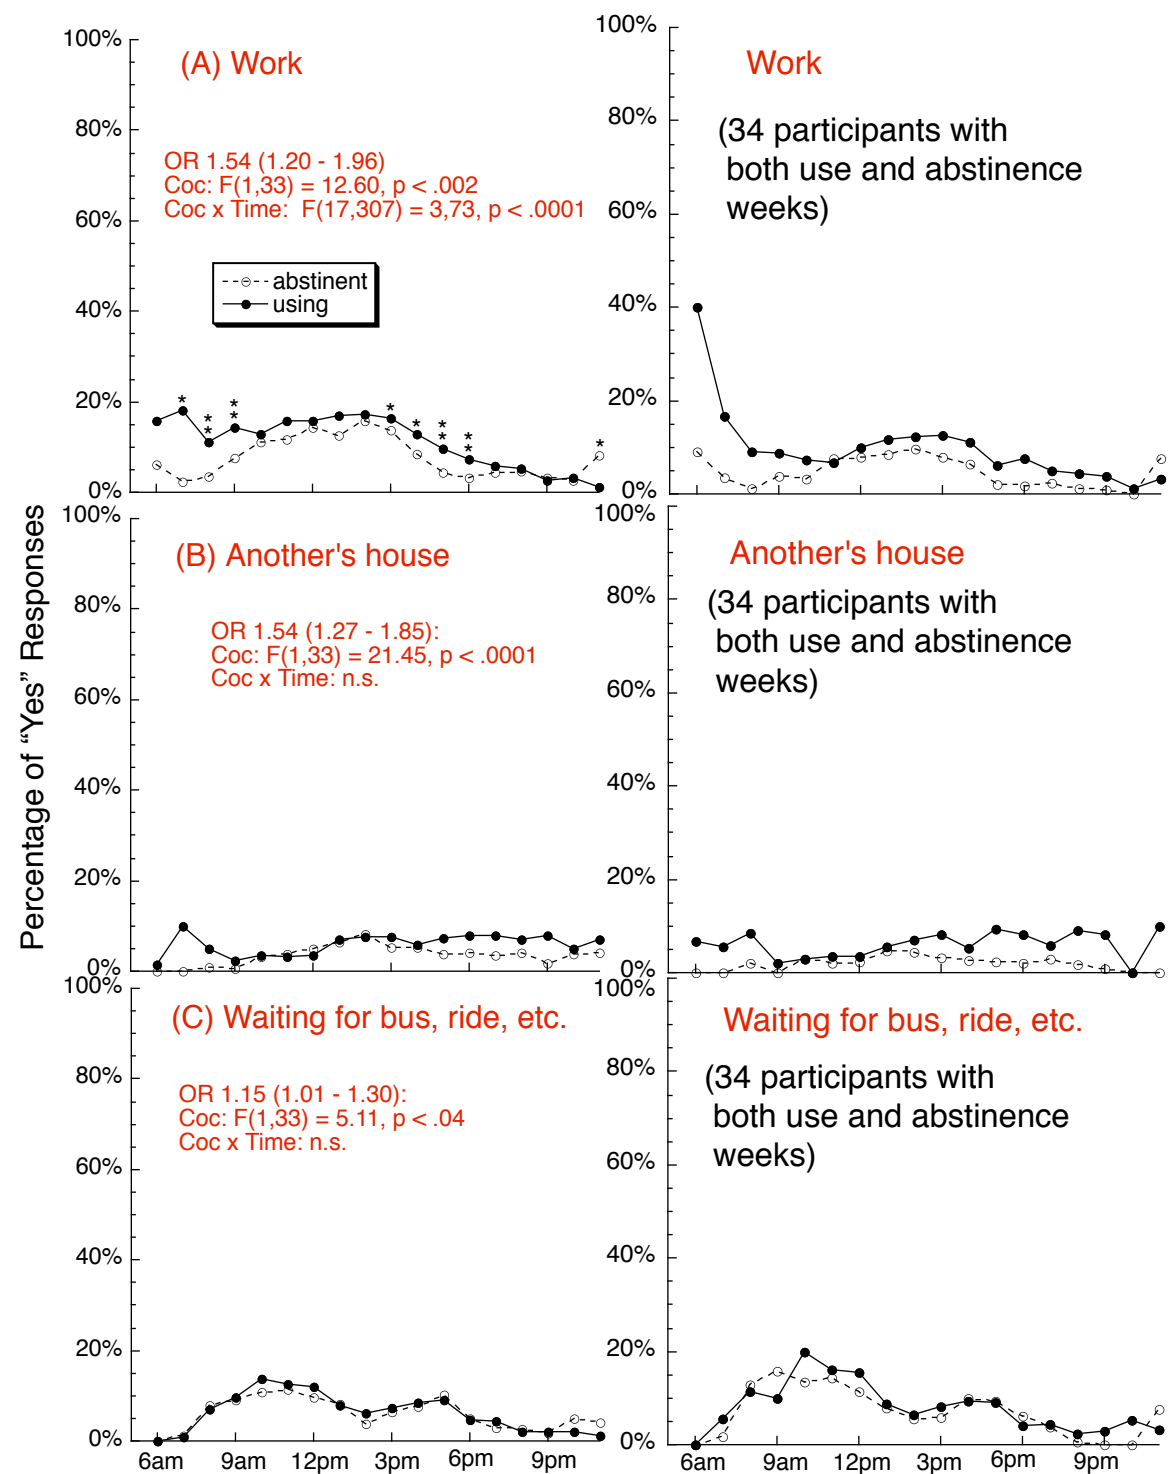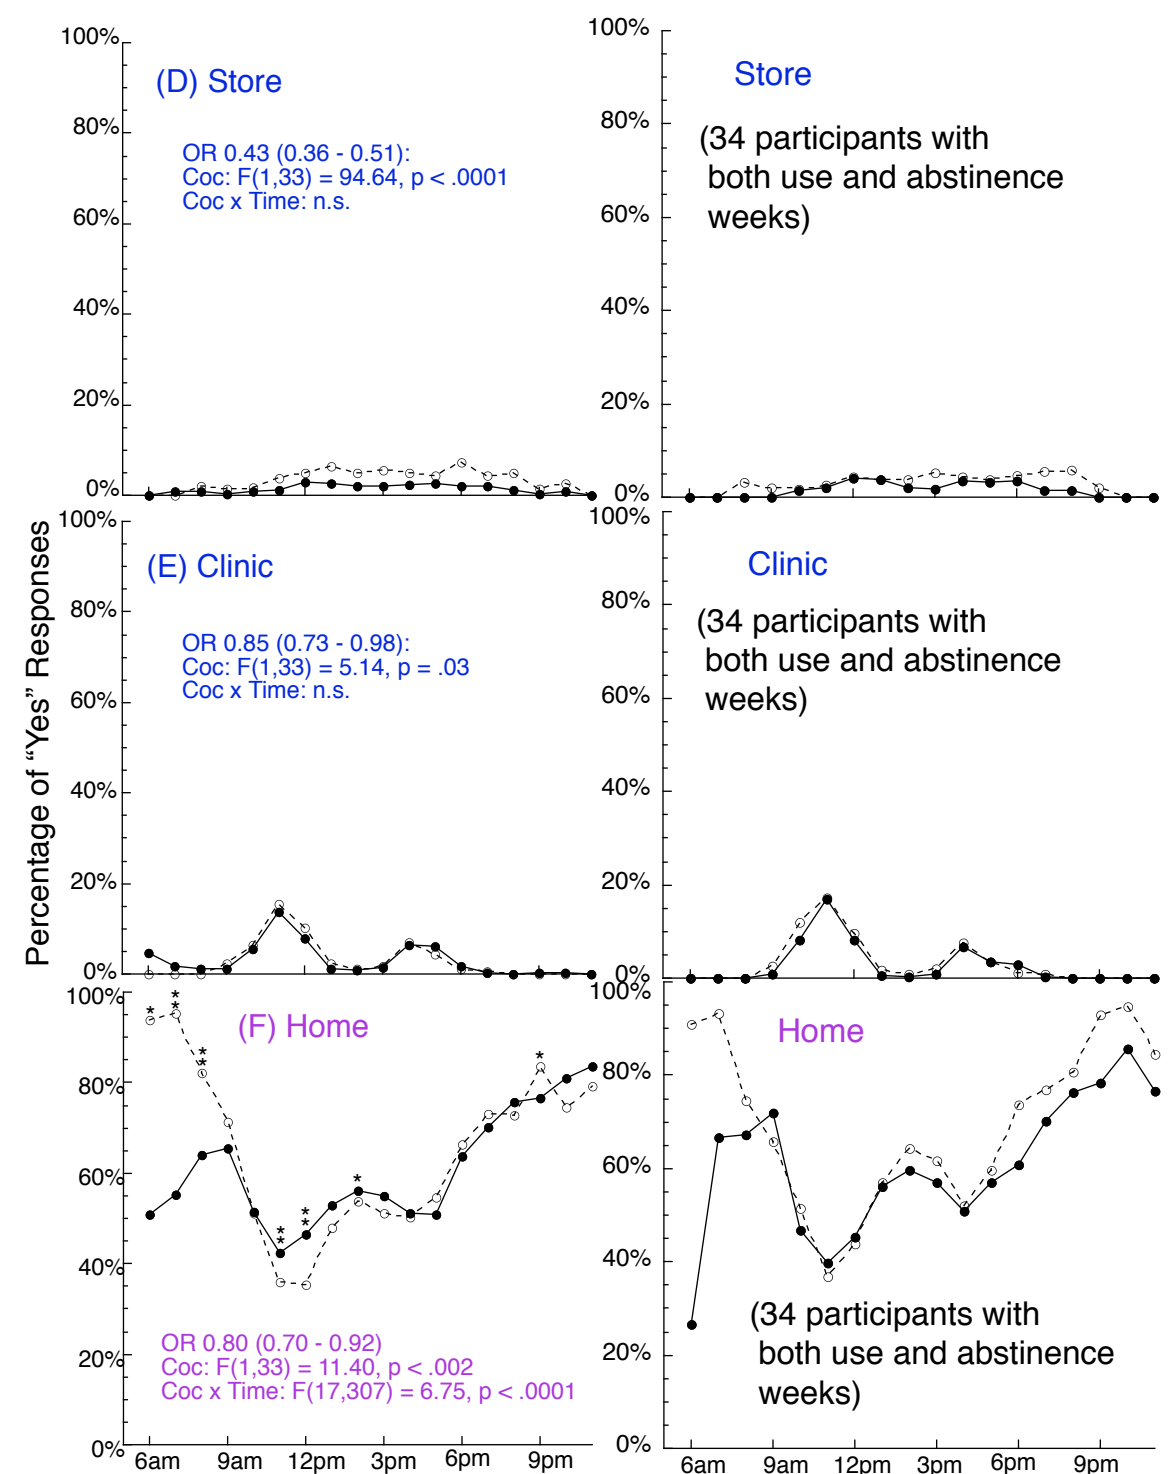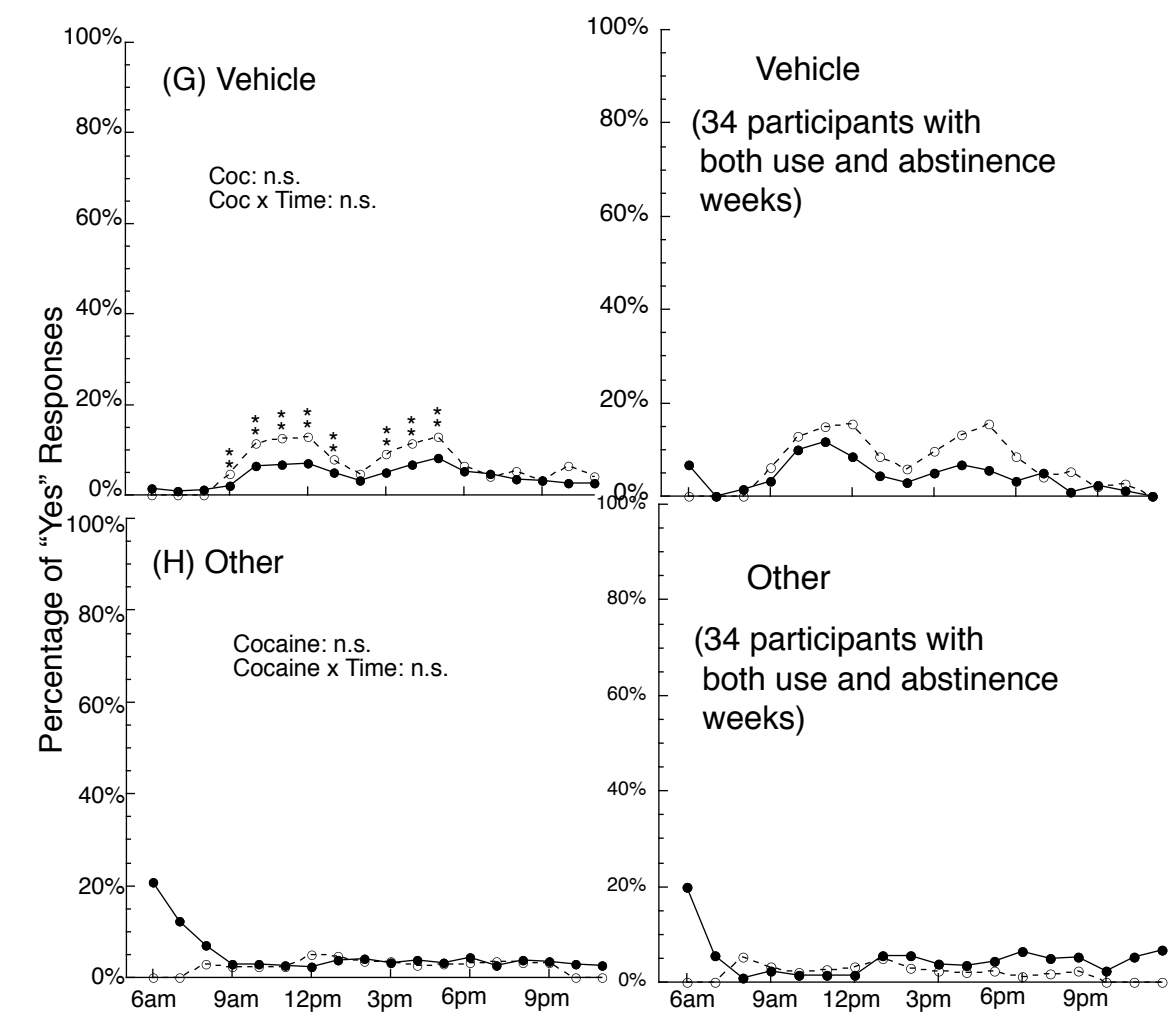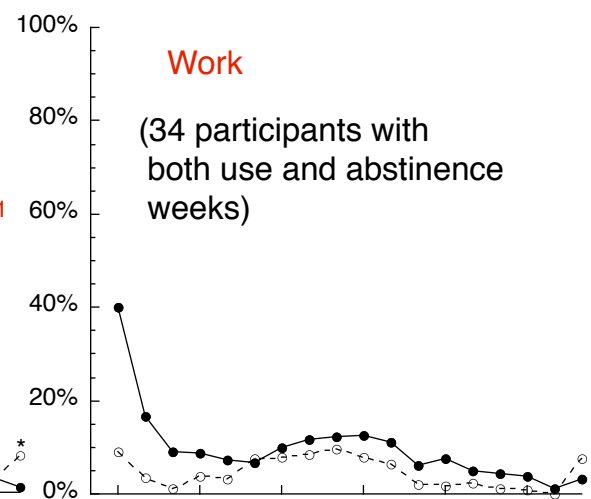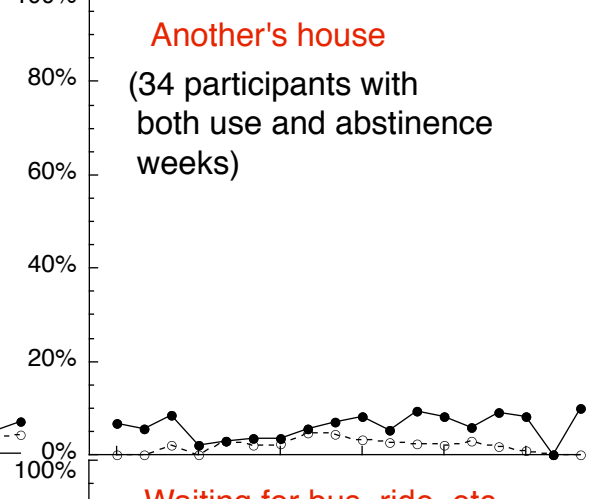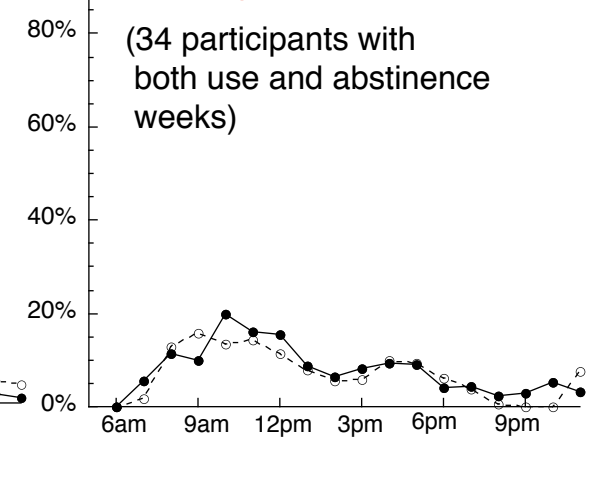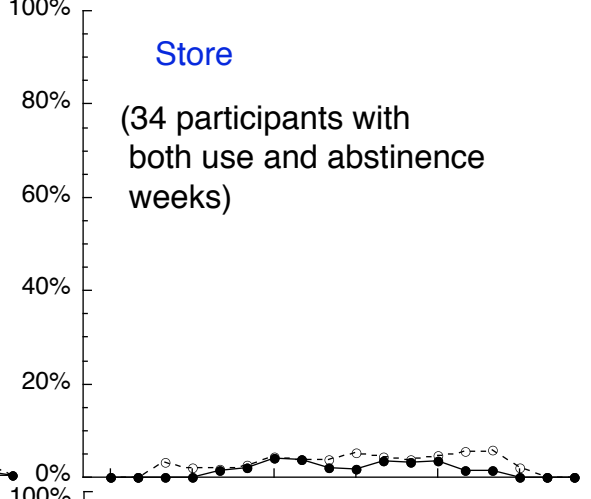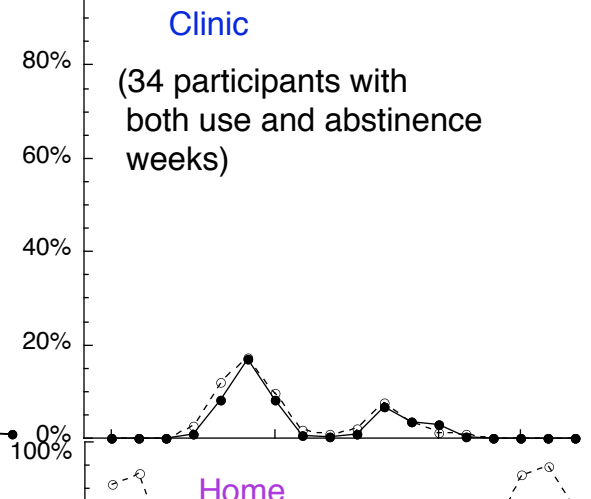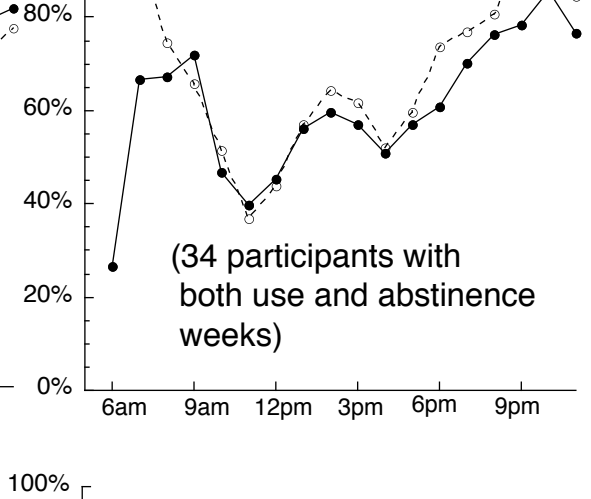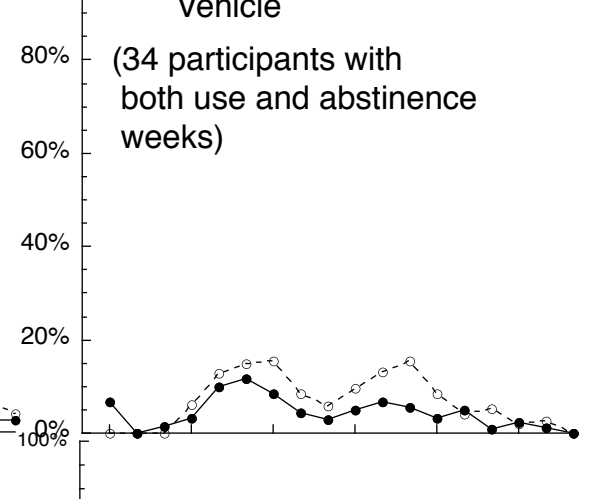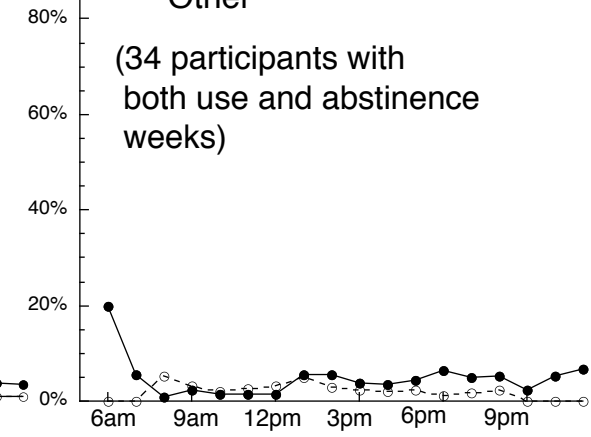

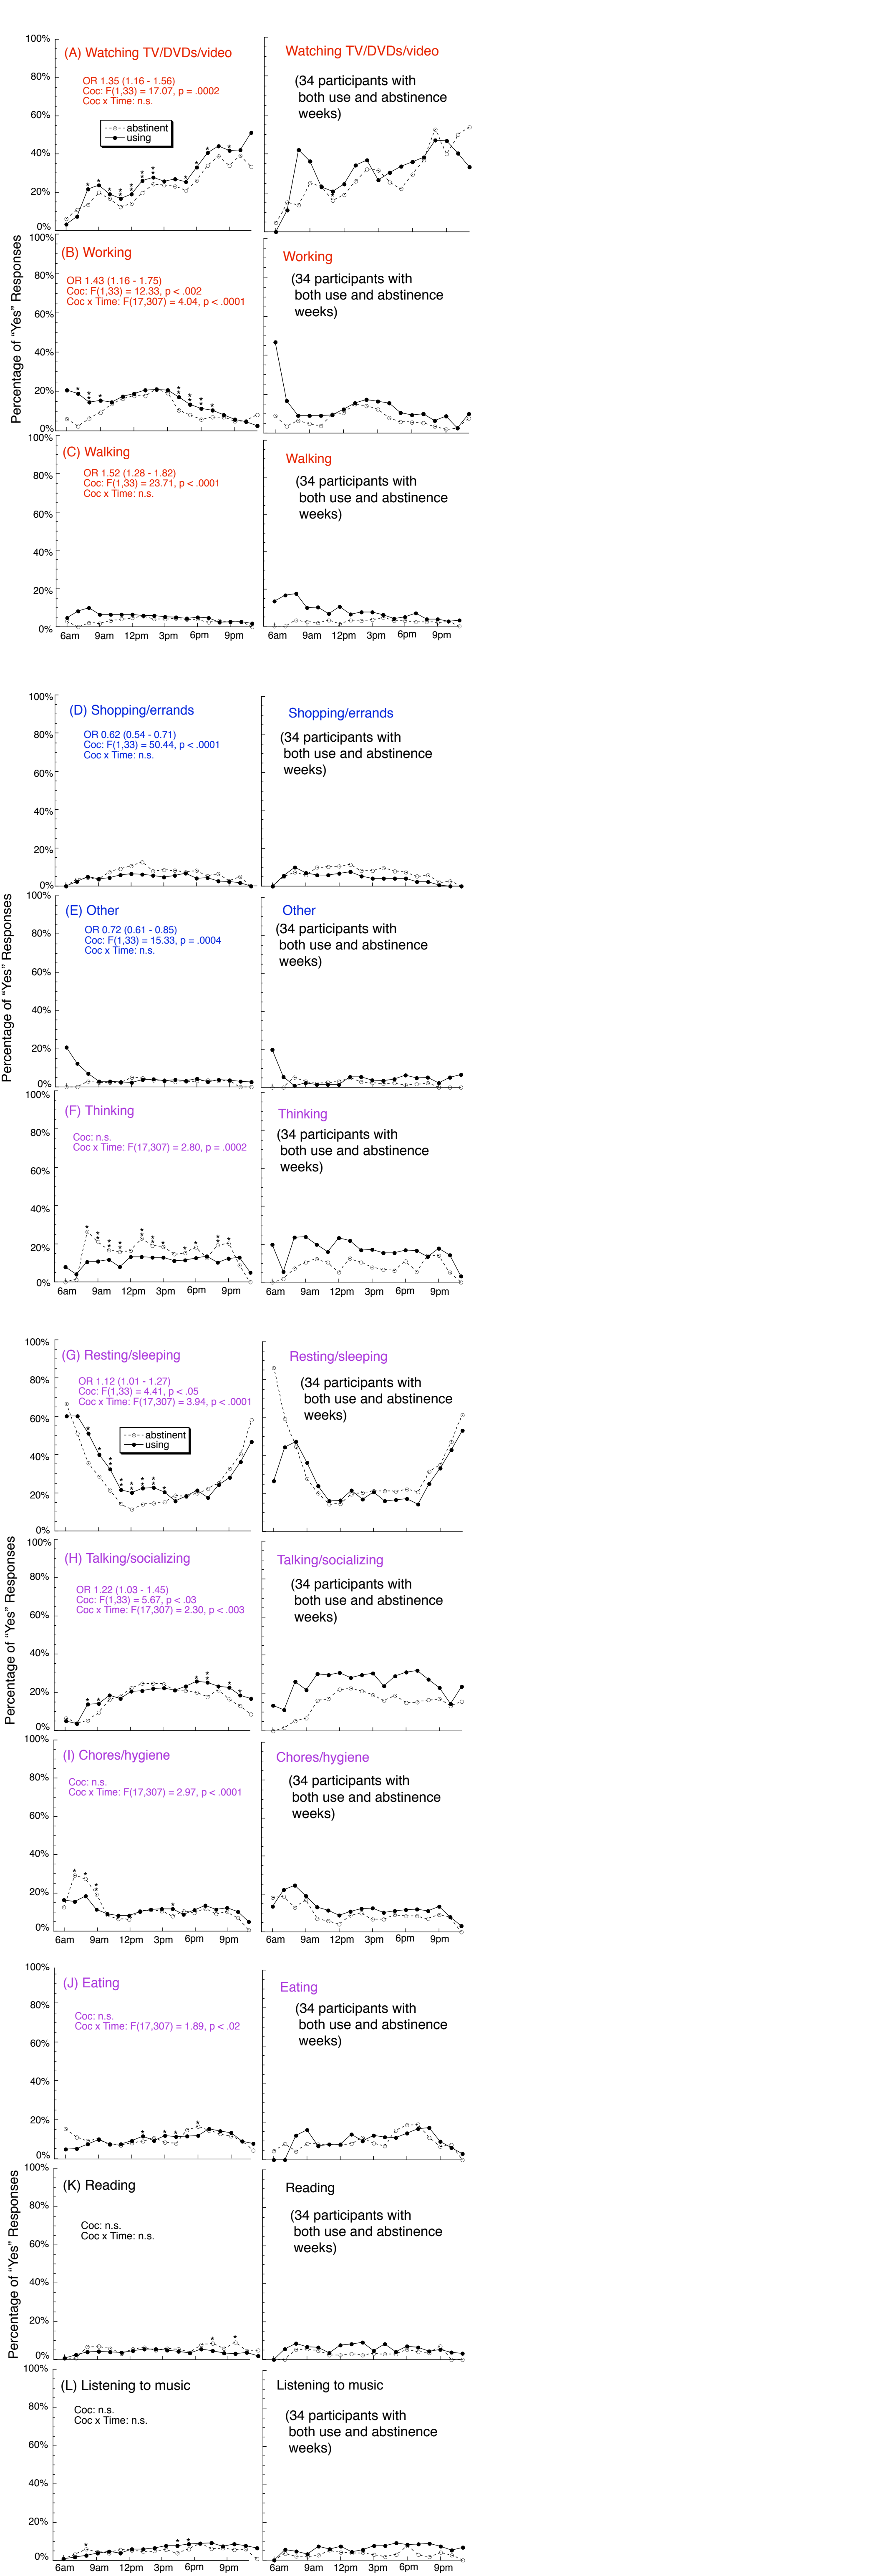



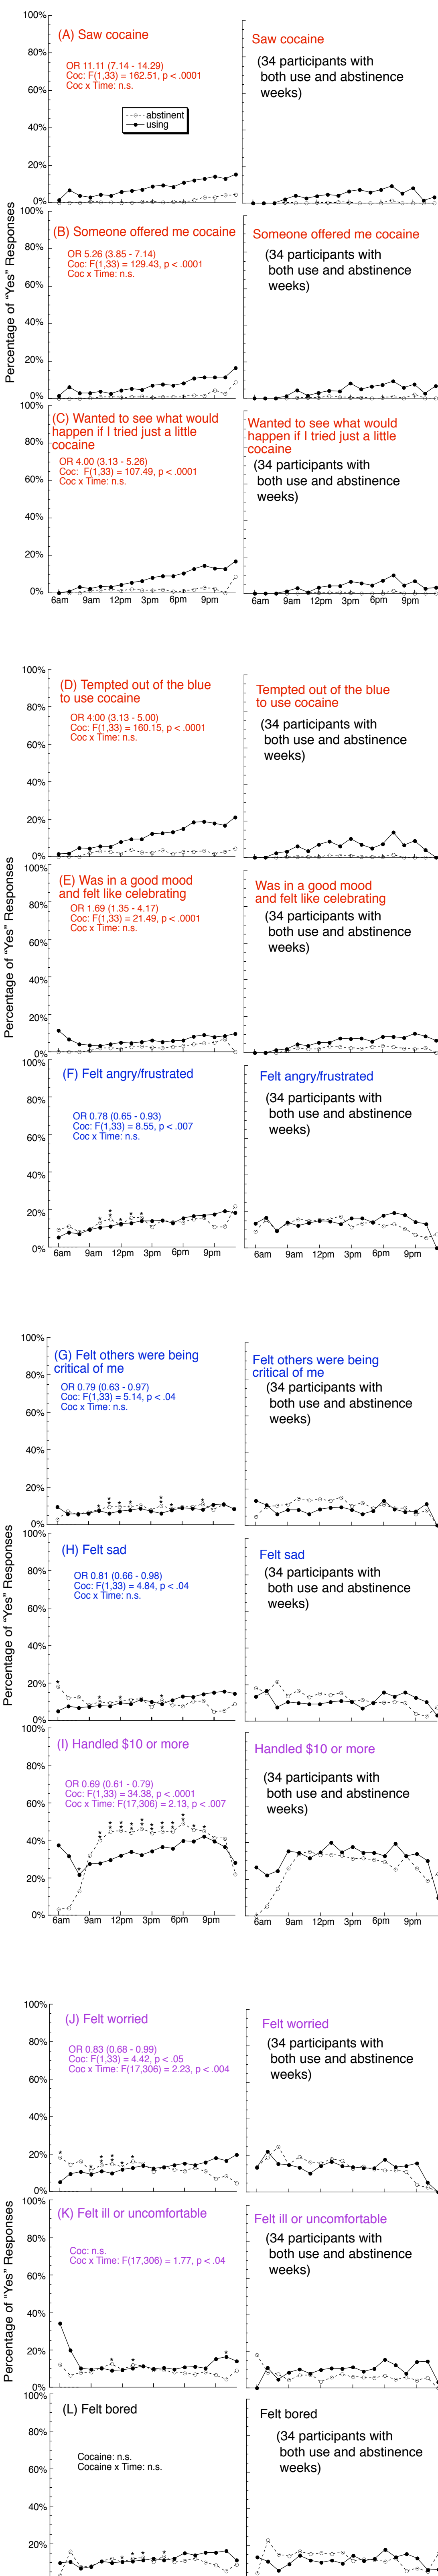

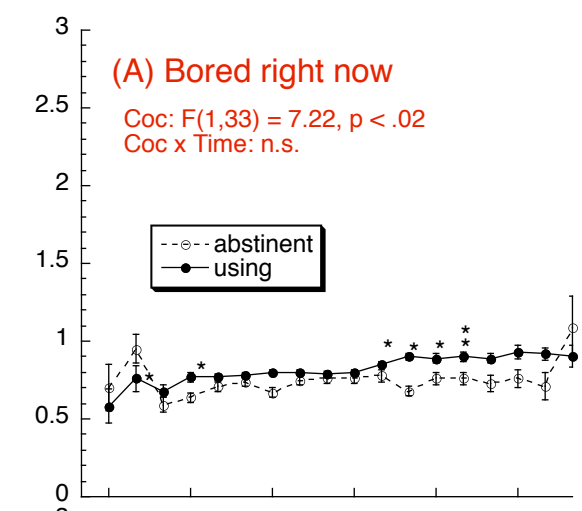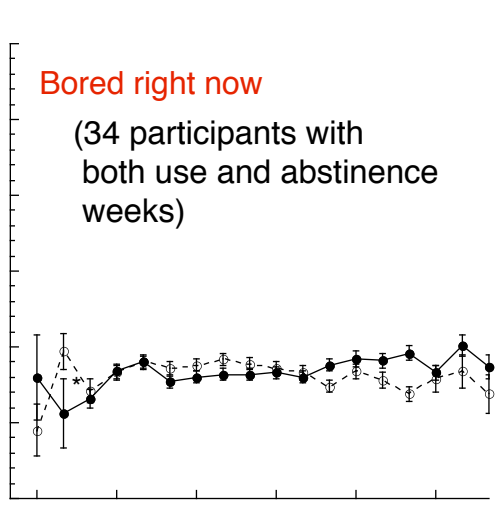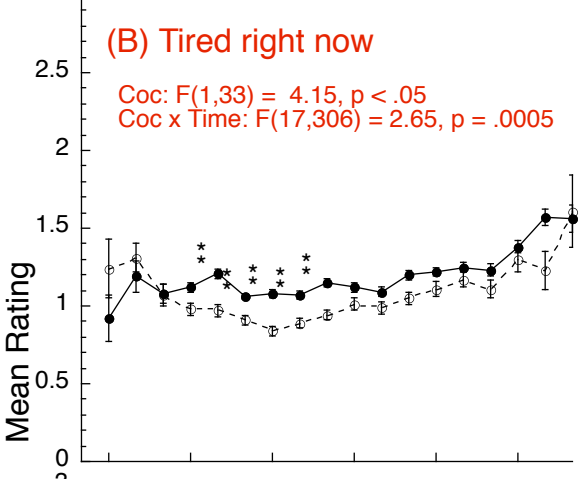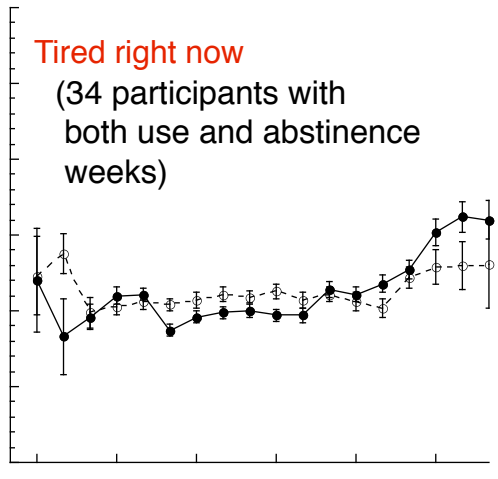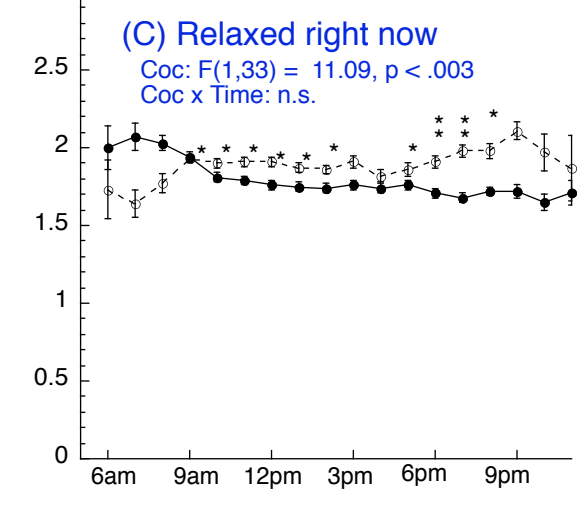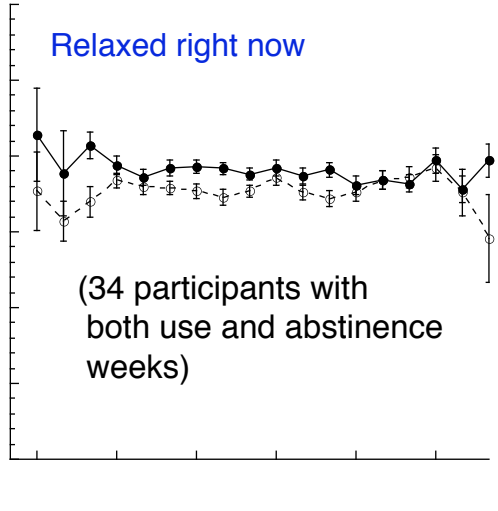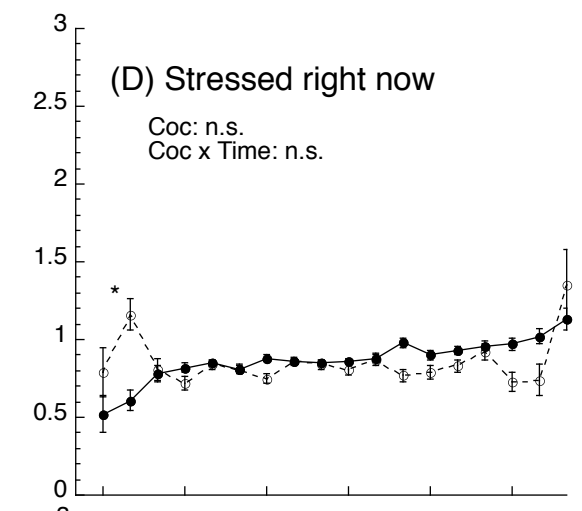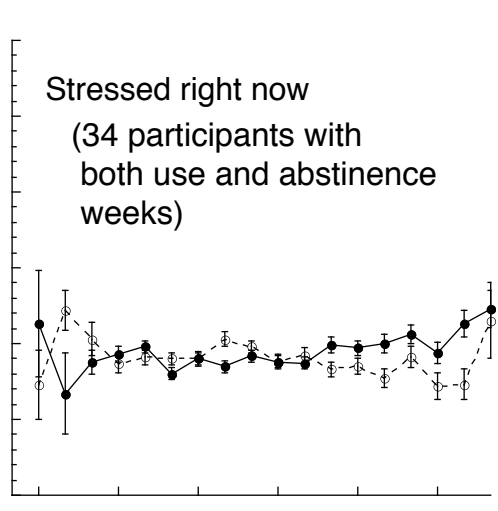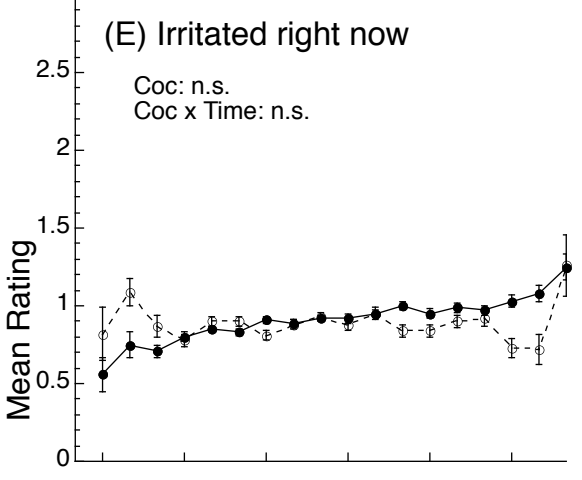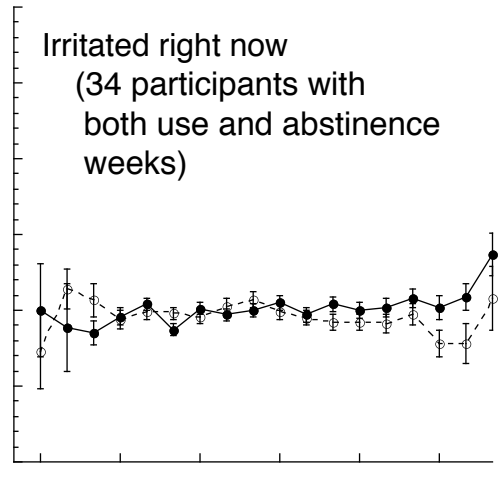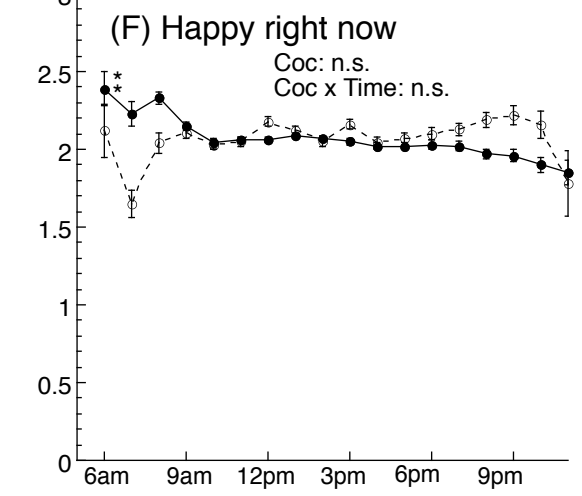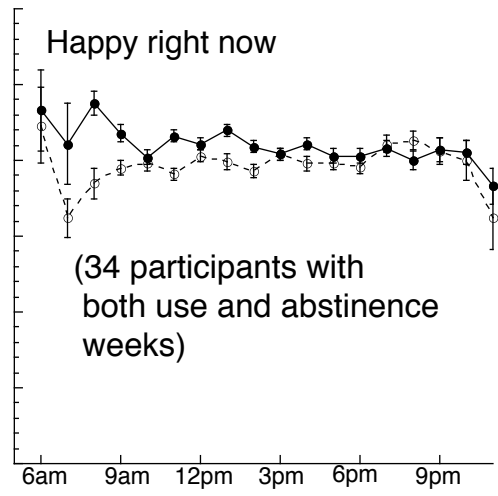

Supplement: NIHMS233667-supplement-Supplementary_data.pdf [file NIHMS233667-supplement-Supplementary_data.pdf]
